# Supplementary material
Source: publisher site journal article supplement (https://www.degruyter.com/publication/journal_key/IPH/downloadAsset/IPH_Manuscript%20Checklist.pdf)
Supplement: Supplementary file 1 [file IPH_Manuscript%20Checklist.pdf]

## General format and length of article types accepted for submission

Word count: title page, abstract, tables, figures, references, abbreviations, appendices & supplementary material are excluded.

|                                                       | Word count | Word count in abstract                                                 | Number of keywords | Number of Tables & Figures |
|-------------------------------------------------------|------------|------------------------------------------------------------------------|--------------------|----------------------------|
| Research Article/ Original Article/<br>Original Paper | 8500       | 250, structured<br><i>Objectives, Methods, Results and Conclusions</i> | 3–6                | Up to 10                   |
| Review                                                | 1200       | n/a                                                                    | 3–6                | x                          |
| Editorial/ Preface                                    | 1500       | n/a                                                                    | n/a                | 1                          |

### When you submit your work, please ensure the following

- You have read the [Instructions for Authors](#).
- The manuscript is complete including images and graphics.
- The title page information includes the full title, short title, the full names of all authors (given name, middle initials, family name), and the full address, affiliation and the academic title of the corresponding author.
- Abstract, keywords, tables and figures, and captions and legends are included, depending on the manuscript type.
- Manuscript is spell-checked and within the agreed-upon word limit.
- Footnotes are in the correct format according to the Style Sheet.
